# Supplementary material for: The additive effect of the triglyceride-glucose index and estimated glucose disposal rate on long-term mortality among individuals with and without diabetes: a population-based study
Source: PubMed Central journal article supplement — Cardiovasc Diabetol. 2024 Aug 22;23:307. doi: 10.1186/s12933-024-02396-8 (PMC11342524; doi:10.1186/s12933-024-02396-8), 2024-08-22
Supplement: 12933_2024_2396_MOESM1_ESM.pdf [file 12933_2024_2396_MOESM1_ESM.pdf]

## Overall population

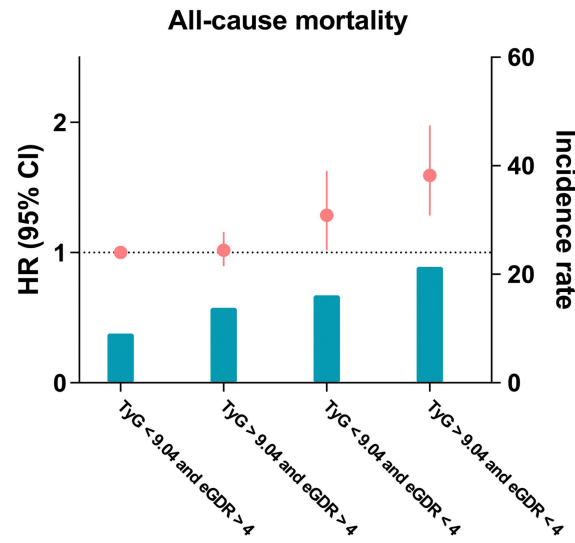

## Nondiabetes

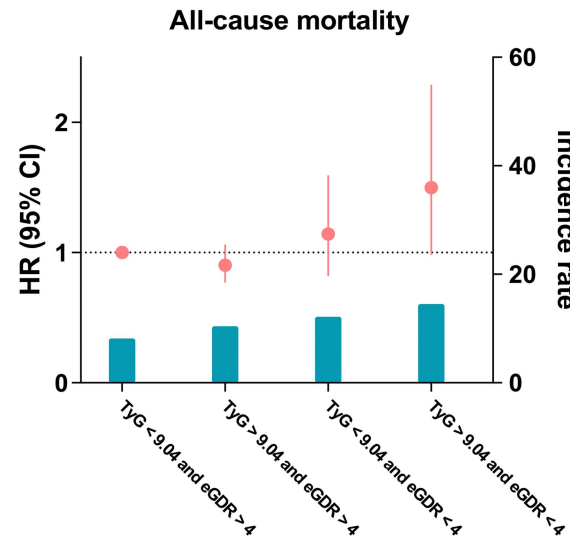

## Diabetes

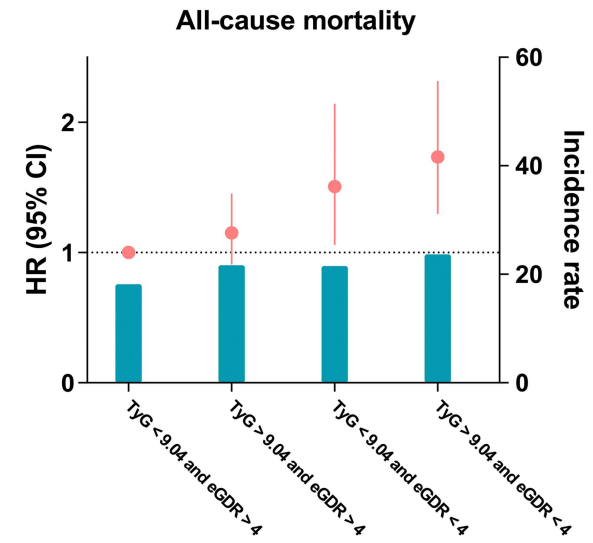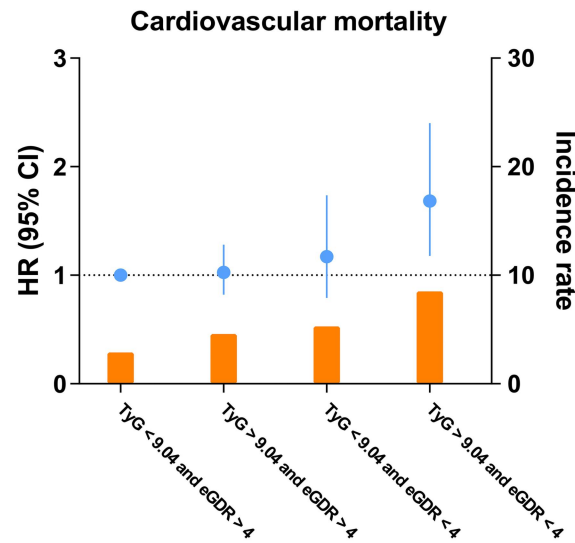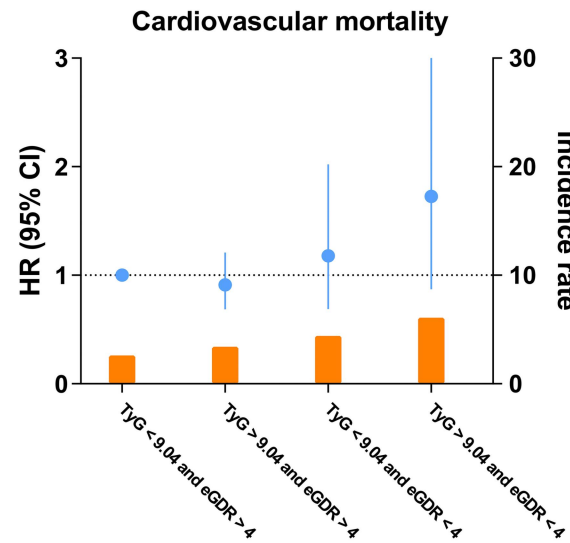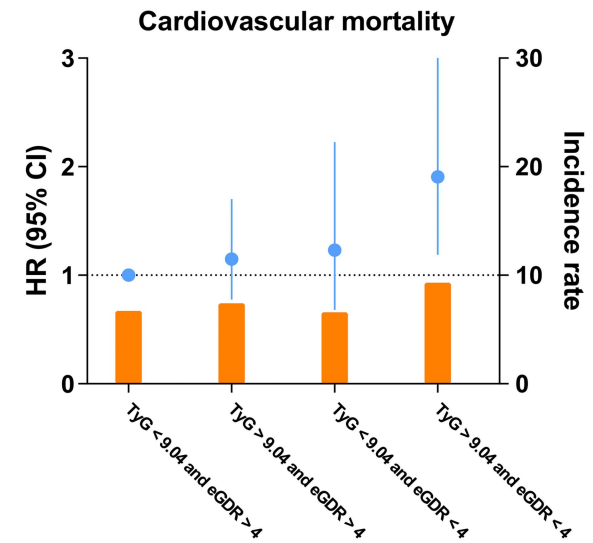

Individuals with high TyG and low eGDR (TyG>9.04 and eGDR<4) showed a higher risk of mortality than the others, indicating a potential additive effect of the TyG index and eGDR on the risk of long-term mortality in individuals with or without diabetes, which provided additional information for prognostic prediction and contributed to improving risk stratification.
